# Supplementary material for: Leaf-to-Whole Plant Spread Bioassay for Pepper and Ralstonia solanacearum Interaction Determines Inheritance of Resistance to Bacterial Wilt for Further Breeding
Source: PubMed Central journal article supplement (PMC7956186; doi:10.3390/ijms22052279), 2021-02-25
Supplement: ijms-22-02279-s001.pdf [file ijms-22-02279-s001.pdf]

**Supplementary Table S1.** Primer information used for RT-PCR analysis of cell death gene expression in this study.

| Clone name       | Sequence information (5'->3') |                                | T <sub>m</sub> (°C) | size (bp) | Accession No. (NCBI) | References |
|------------------|-------------------------------|--------------------------------|---------------------|-----------|----------------------|------------|
|                  | Forward                       | Reverse                        |                     |           |                      |            |
| <i>CaHsr203J</i> | CGCCATCAGCGTCTCCGTCTT<br>C    | CGCCCATCGGACATGTGATT<br>G      | 58                  | 413       | AB162220             | [34]       |
| <i>CaCDM1</i>    | AAAGGCGCAAACGGGAGCT<br>G      | TCACAGCCAAACGCTTCGAT<br>CC     | 60                  | 400       | GD056272             | [53]       |
| <i>CaHIN1</i>    | ATCTTCACTATTCTCATCGTC<br>CTTG | TGCAAACCTGCTAGTATTCTTG<br>TGAC | 58                  | 296       | AB162221             | [34]       |
| <i>CaPR10</i>    | ATGGGTGCTTATACCT              | TTAAACATAGACAGAAGGAT           | 54                  | 480       | JF345171             | [36]       |
| <i>CaPR4</i>     | ATCATGGAGAGTGTTACCAA          | ATCCCAAGTAGCGCAGTAAG           | 58                  | 171       | AFN21550             | [36]       |
| <i>CaAccOX</i>   | AGAAAGCTGCAGAGGAAAG<br>CAAAC  | TGAGATGCAACCGTTACTCC<br>TATAC  | 58                  | 343       | XM_016698789         | [36]       |
| <i>CaActin</i>   | CCACCTCTTCACTCTCTGCTC<br>T    | ACTAGGAAAAACAGCCCTTG<br>GT     | 58                  | 165       | AY572427             | [34]       |

**Supplementary Table S2.** Disease evaluation design and the number of plants to parents and their progenies based on disease severity index in 15, 20, and 30 dai against *R. solanacearum* SL1931 strain.

| Days after inoculation | Population <sup>a</sup> | No. of Plants | Disease severity index |    |    |   |    | Mean of DSI <sup>b</sup> | Wilt rate (%) <sup>c</sup> | AUDPC <sup>d</sup> |
|------------------------|-------------------------|---------------|------------------------|----|----|---|----|--------------------------|----------------------------|--------------------|
|                        |                         |               | 0                      | 1  | 2  | 3 | 4  |                          |                            |                    |
| 15                     | MC4                     | 30            | 8                      | 22 | 0  | 0 | 0  | 0.7                      | 0                          | 7.5                |
|                        | Subicho                 | 30            | 0                      | 0  | 0  | 0 | 30 | 4.0                      | 100                        | 50.3               |
|                        | F <sub>1</sub>          | 30            | 0                      | 17 | 2  | 1 | 10 | 2.13                     | 36.6                       | 22.7               |
|                        | F <sub>2</sub>          | 90            | 0                      | 60 | 3  | 7 | 20 | 1.89                     | 32.2                       | 21.9               |
| 20                     | MC4                     | 30            | 6                      | 24 | 0  | 0 | 0  | 0.8                      | 0                          | 7.5                |
|                        | Subicho                 | 30            | 0                      | 0  | 0  | 0 | 30 | 4.0                      | 100                        | 50.3               |
|                        | F <sub>1</sub>          | 30            | 0                      | 12 | 4  | 0 | 14 | 2.5                      | 46.7                       | 22.7               |
|                        | F <sub>2</sub>          | 90            | 0                      | 44 | 11 | 1 | 34 | 2.3                      | 38.8                       | 21.9               |
| 30                     | MC4                     | 30            | 0                      | 30 | 0  | 0 | 0  | 1.0                      | 0                          | 16.5               |
|                        | Subicho                 | 30            | 0                      | 0  | 0  | 0 | 30 | 4.0                      | 100                        | 90.3               |
|                        | F <sub>1</sub>          | 30            | 0                      | 0  | 7  | 1 | 22 | 3.5                      | 73.3                       | 52.9               |
|                        | F <sub>2</sub>          | 90            | 0                      | 1  | 41 | 3 | 46 | 3.0                      | 54.4                       | 48.5               |

<sup>a</sup> 'MC4' and 'Subicho' is resistance (R) and susceptible (S) parent line, respectively. The F<sub>1</sub> population crossed 'Subicho' (S) x 'MC4' (R) and F<sub>2</sub> population derived from self-cross of F<sub>1</sub> plants.

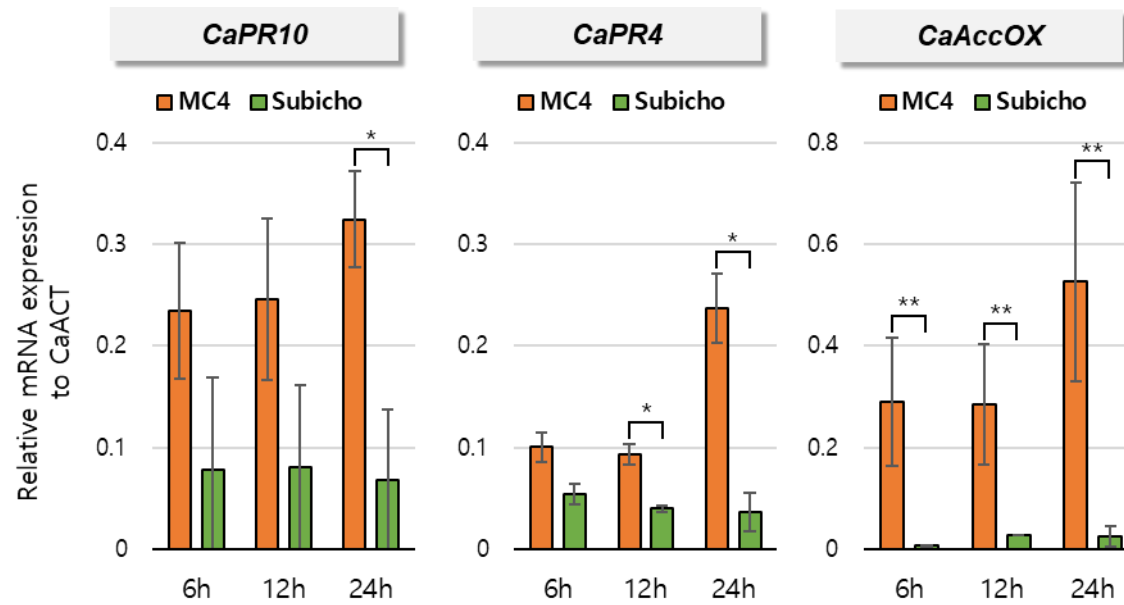

**Supplementary Figure S1.** Relative expression level of defense-related genes according to *CaPR1*, *CaPR4*, and *CaAccOX* was analyzed through *R. solanacearum* infection in 'MC4' and 'Subicho' leaves. Expression value was calculated and then normalized to *CaActin* expression. Asterisks indicate statistically significant differences according to Student's t-test (\* $p < 0.05$ , \*\* $p < 0.01$ ).

**A**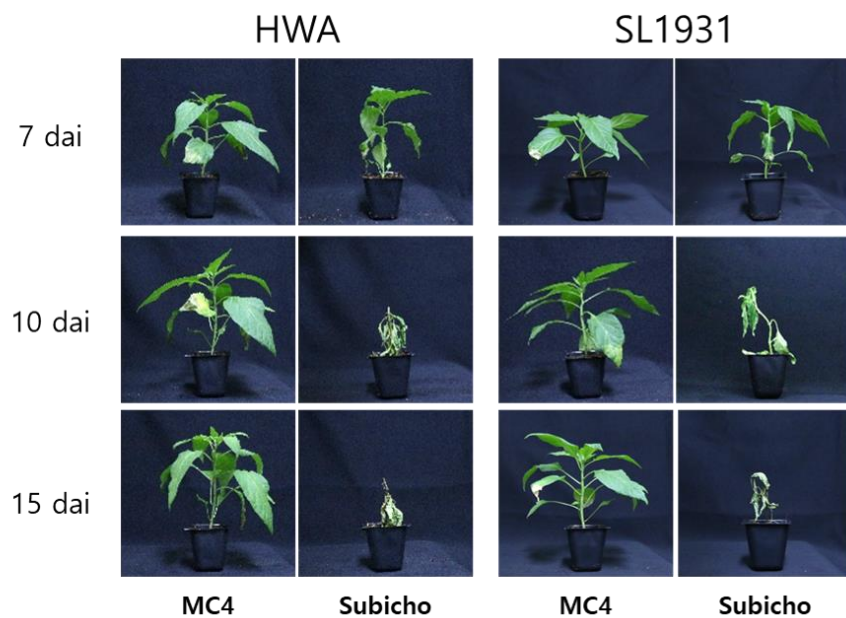**B**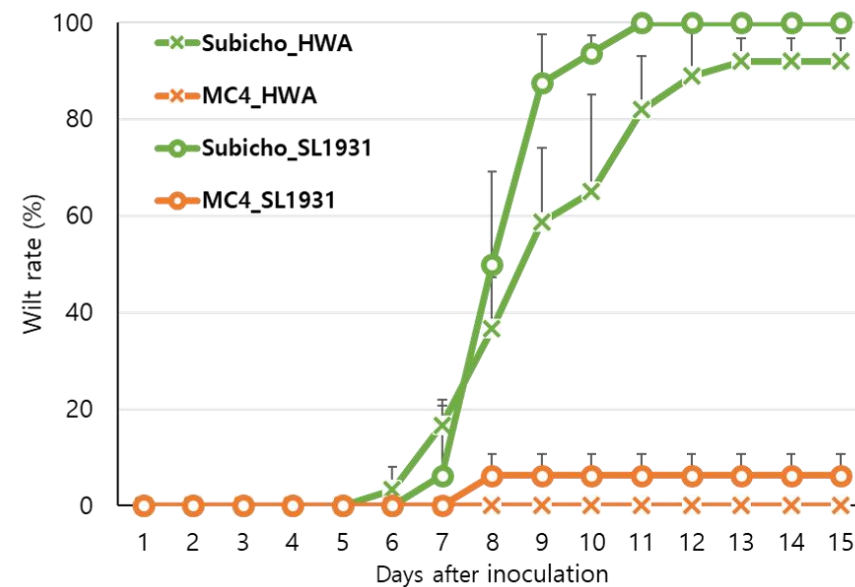

**Supplementary Figure S2.** Disease symptoms in 'MC4' and 'Subicho' with two *R. solanacearum* strains, SL1931 and HWA. (A), The phenotype of bacterial wilt (BW) in 'MC4' and 'Subicho' through leaf-inoculation with two *R. solanacearum* strains according at 7, 10 and 15 dai is shown. (B) Disease progression of BW disease on 'MC4' and 'Subicho'. Disease severity of the plants was investigated every day after inoculation. In total, 30 plants were analyzed for each cultivar. Each data point represents the mean disease index for two independent experiment.
